# Supplementary material for: Divergent strategy for the synthesis of original dihydrobenzo- and dihydronaphtho-acridines
Source: Royal Society of Chemistry journal article supplement (doi:10.1039/c5ob00456j), 2015-01-01

**Supporting Information**

**DOI:**

**Title:** Divergent strategy in the synthesis of original dihydrobenzo- and dihydronaphtho-acridines

**Author(s):** K. Solmont,<sup>a</sup> H. Boufroua,<sup>a</sup> A. Souibgui,<sup>a,b</sup> P. Fornarelli,<sup>c</sup> Anne Gaucher,<sup>a\*</sup> F. Mahuteau-Betzer,<sup>c</sup> B. Ben Hassine,<sup>b</sup> D. Prim<sup>a\*</sup>

| <b>Table of contents</b>                                                                                                                                                                                   | <b>Pages</b> |
|------------------------------------------------------------------------------------------------------------------------------------------------------------------------------------------------------------|--------------|
| <sup>1</sup> H NMR and <sup>13</sup> C NMR of 11-iodo-5, 6-dihydrobenzo[ <i>c</i> ]acridine <b>2a</b>                                                                                                      | S3           |
| <sup>1</sup> H NMR and <sup>13</sup> C NMR of 13-iodo-7,8-dihydronaphtho[2,1- <i>c</i> ]acridine <b>2b</b>                                                                                                 | S4           |
| <sup>1</sup> H NMR and <sup>13</sup> C NMR of 11-( <i>o</i> -Tolyl)-5,6-dihydrobenzo[ <i>c</i> ]acridine <b>3a</b>                                                                                         | S5           |
| <sup>1</sup> H NMR and <sup>13</sup> C NMR of 2-(5,6-Dihydrobenzo[ <i>c</i> ]acridin-11-yl)benzaldehyde <b>3c</b>                                                                                          | S6           |
| <sup>1</sup> H NMR and <sup>13</sup> C NMR of 1,3-bis(5,6-dihydrobenzo[ <i>c</i> ]acridin-11-yl)benzene <b>3d</b>                                                                                          | S7           |
| <sup>1</sup> H NMR and <sup>13</sup> C NMR of 13-(2-methoxyphenyl)-7,8-dihydronaphtho[2,1- <i>c</i> ]acridine <b>3b</b>                                                                                    | S8           |
| <sup>1</sup> H NMR and <sup>13</sup> C NMR of ( <i>E</i> )-11-styryl-5,6-dihydrobenzo[ <i>c</i> ]acridine <b>4a</b>                                                                                        | S9           |
| <sup>1</sup> H NMR and <sup>13</sup> C NMR of ( <i>E</i> )-13-styryl-7,8-dihydronaphtho[2,1- <i>c</i> ]acridine <b>4b</b>                                                                                  | S10          |
| <sup>1</sup> H NMR and <sup>13</sup> C NMR of 11-(phenylethynyl)-5,6-dihydrobenzo[ <i>c</i> ]acridine <b>5a</b>                                                                                            | S11          |
| <sup>1</sup> H NMR and <sup>13</sup> C NMR of 13-(Phenylethynyl)-7,8-dihydronaphtho[2,1- <i>c</i> ]acridine <b>5b</b>                                                                                      | S12          |
| <sup>1</sup> H NMR and <sup>13</sup> C NMR of <i>N</i> <sup>1</sup> -(5,6-dihydrobenzo[ <i>c</i> ]acridin-11-yl)- <i>N</i> <sup>3</sup> , <i>N</i> <sup>3</sup> -dimethyl<br>propane-1,3-diamine <b>6a</b> | S13          |
| <sup>1</sup> H NMR of <i>N</i> <sup>1</sup> -(7,8-dihydronaphtho[2,1- <i>c</i> ]acridin-13-yl)- <i>N</i> <sup>3</sup> , <i>N</i> <sup>3</sup> -dimethylpropane<br>1,3-diamine <b>6b</b>                    | S14          |
| <sup>1</sup> H NMR and <sup>13</sup> C NMR of 11-(pyridin-3-yl)-5,6-dihydrobenzo[ <i>c</i> ]acridine <b>7a</b>                                                                                             | S15          |
| <sup>1</sup> H NMR and <sup>13</sup> C NMR of 11-(pyridin-2-yl)-5,6-dihydrobenzo[ <i>c</i> ]acridine <b>7d</b>                                                                                             | S16          |
| <sup>1</sup> H NMR and <sup>13</sup> C NMR of 11-(quinolin-3-yl)-5,6-dihydrobenzo[ <i>c</i> ]acridine <b>7b</b>                                                                                            | S17          |
| <sup>1</sup> H NMR and <sup>13</sup> C NMR of 11-(quinolin-8-yl)-5,6-dihydrobenzo[ <i>c</i> ]acridine <b>7c</b>                                                                                            | S18          |
| <sup>1</sup> H NMR and <sup>13</sup> C NMR of 11 of 3-(5,6-dihydrobenzo[ <i>c</i> ]acridin-11-yl)-1-methylquinolin<br>1-ium <b>9</b>                                                                       | S19          |

# <sup>1</sup>H NMR and <sup>13</sup>C NMR of 11-iodo-5,6-dihydrobenzo[*c*]acridine 2a:

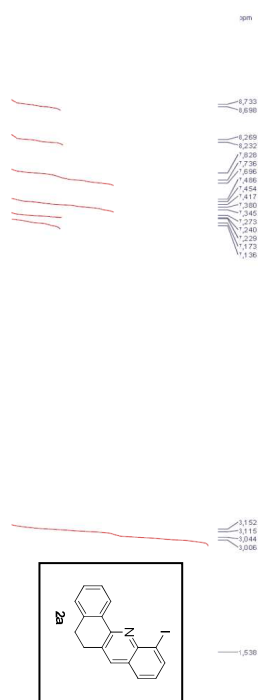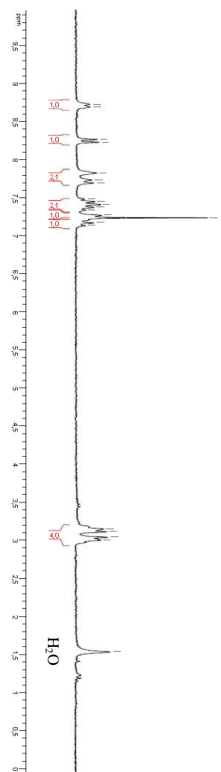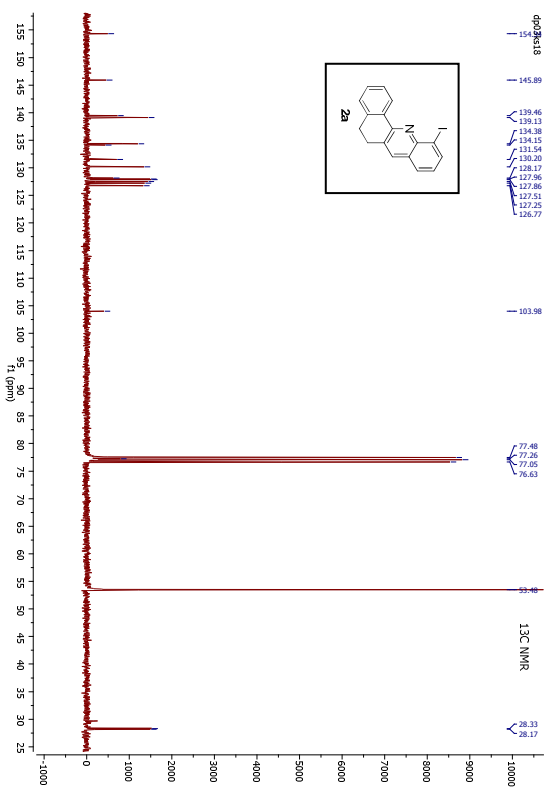

**<sup>1</sup>H NMR and <sup>13</sup>C NMR of 13-iodo-7,8-dihydronaphtho[2,1-c]acridine 2b:**

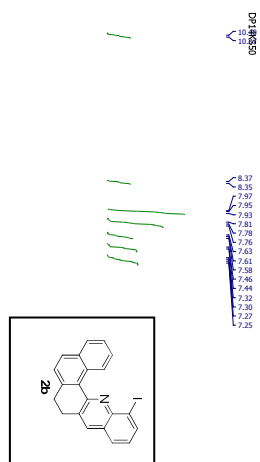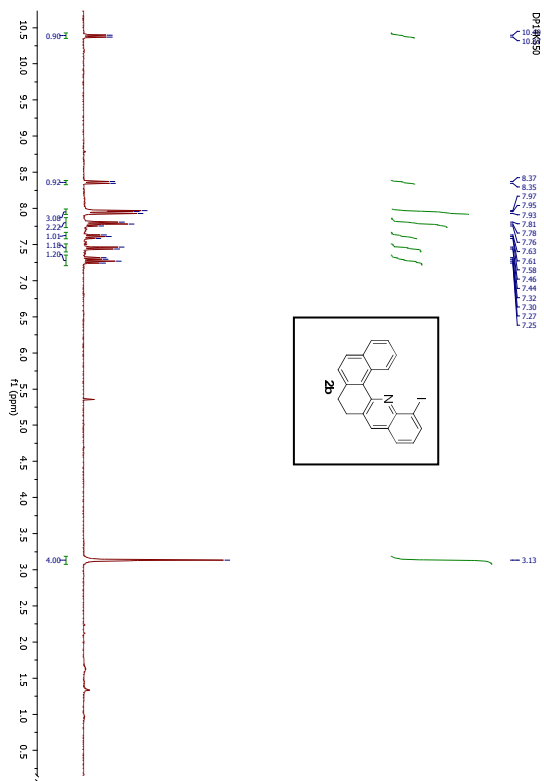

Chemical shift list (ppm):

- 155.86590
- 146.2386
- 140.5794
- 139.4015
- 134.0073
- 133.9611
- 133.7099
- 131.1166
- 131.0622
- 129.2902
- 128.9390
- 128.2673
- 127.5592
- 127.4675
- 127.3664
- 126.4070
- 125.5451
- 103.6994
- 77.4981
- 77.0765
- 76.8509
- 30.1910
- 29.8747

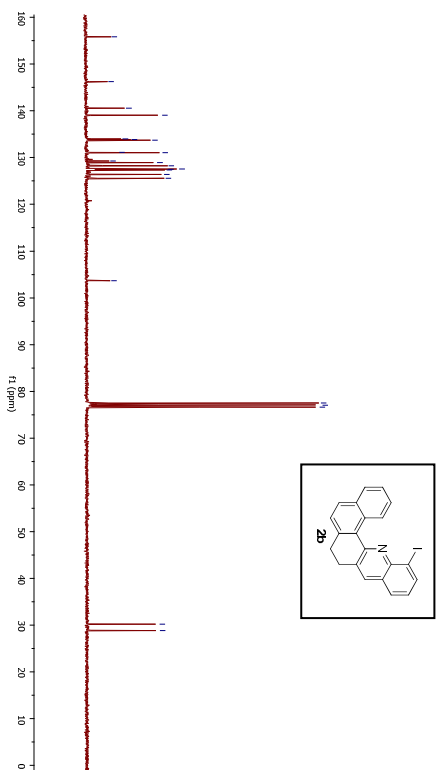



**<sup>1</sup>H NMR and <sup>13</sup>C NMR of 2-(5,6-Dihydrobenzo[c]acridin-11-yl)benzaldehyde 3c:**

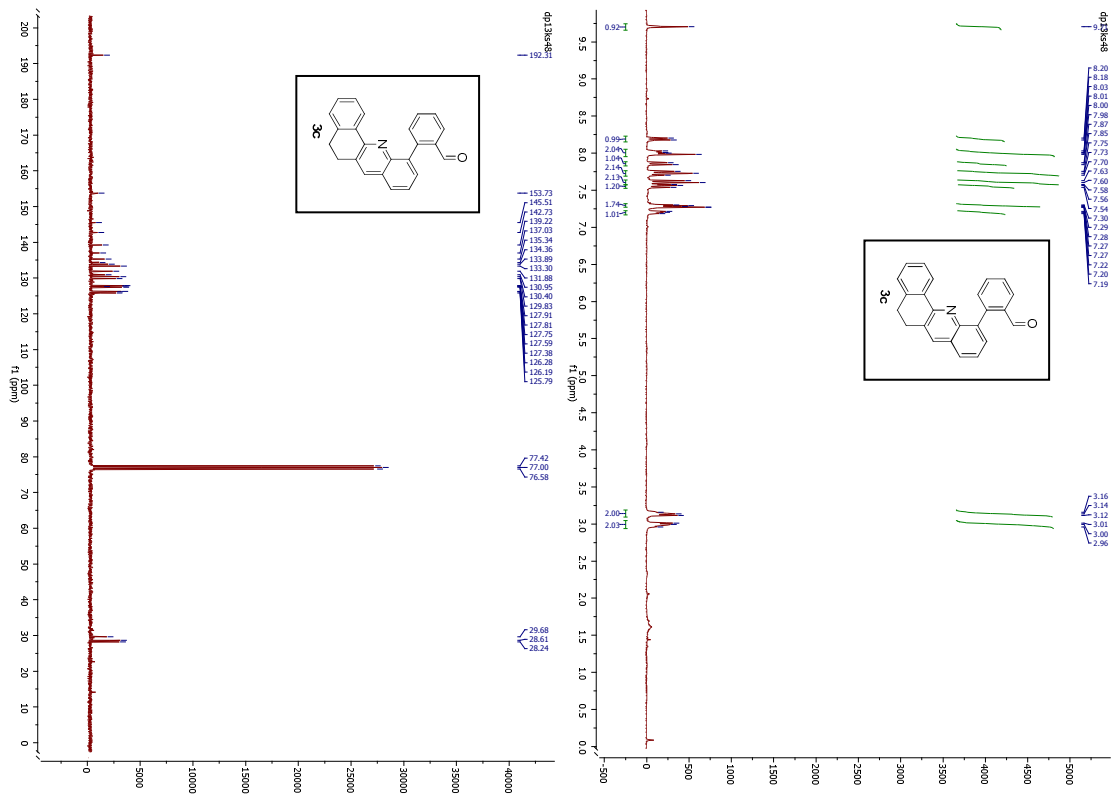







**<sup>1</sup>H NMR and <sup>13</sup>C NMR of (*E*)-11-styryl-5,6-dihydrobenzo[*c*]acridine 4a:**

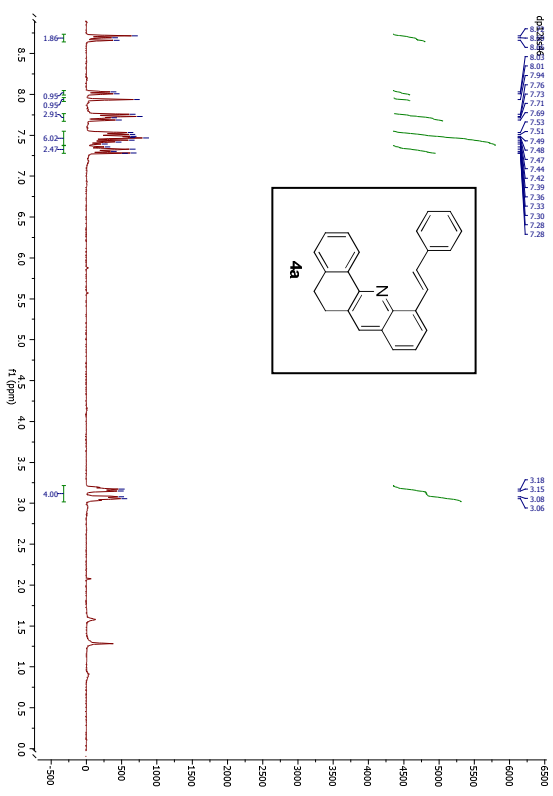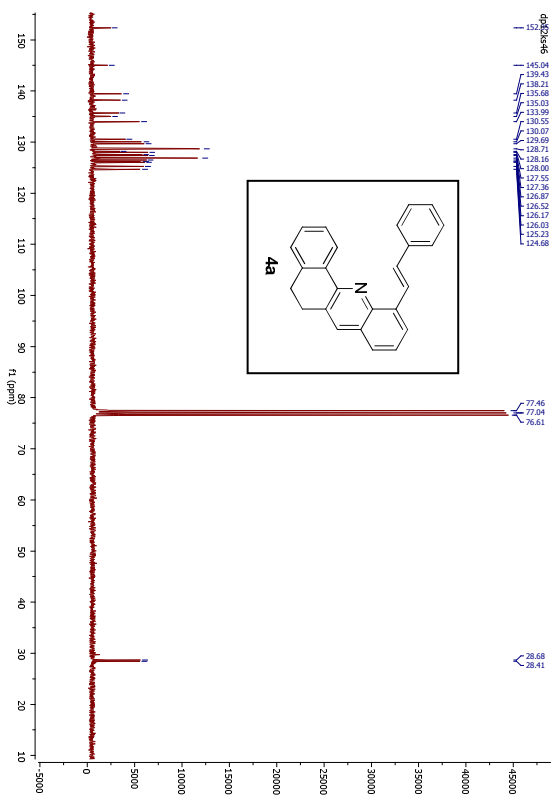

**<sup>1</sup>H NMR and <sup>13</sup>C NMR of (*E*)-13-styryl-7,8-dihydro-naphtho[2,1-*c*]acridine 4b:**

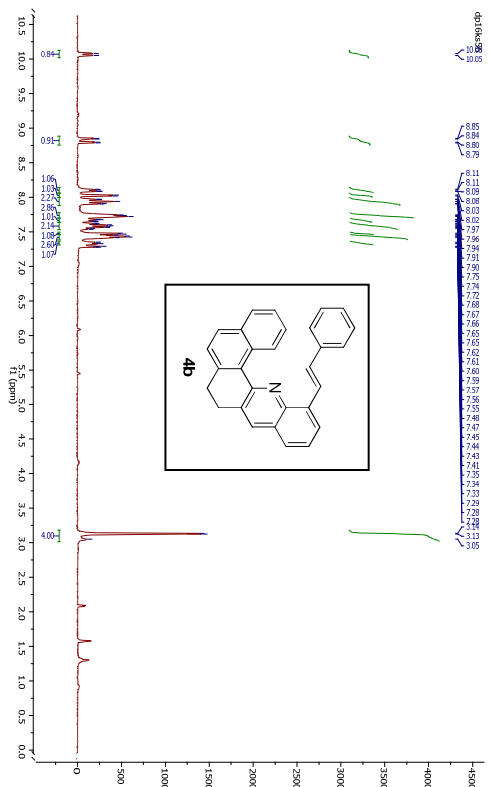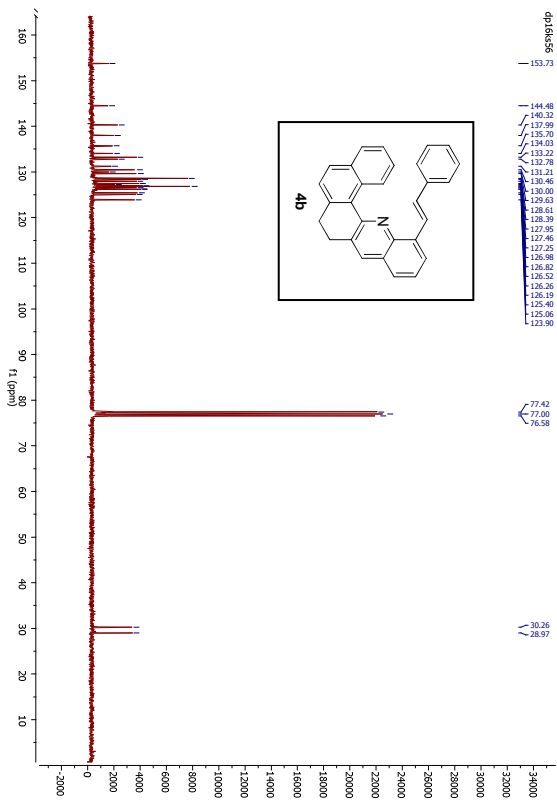

# <sup>1</sup>H NMR and <sup>13</sup>C NMR of 11-(phenylethynyl)-5,6-dihydrobenzo[c]acridine 5a:

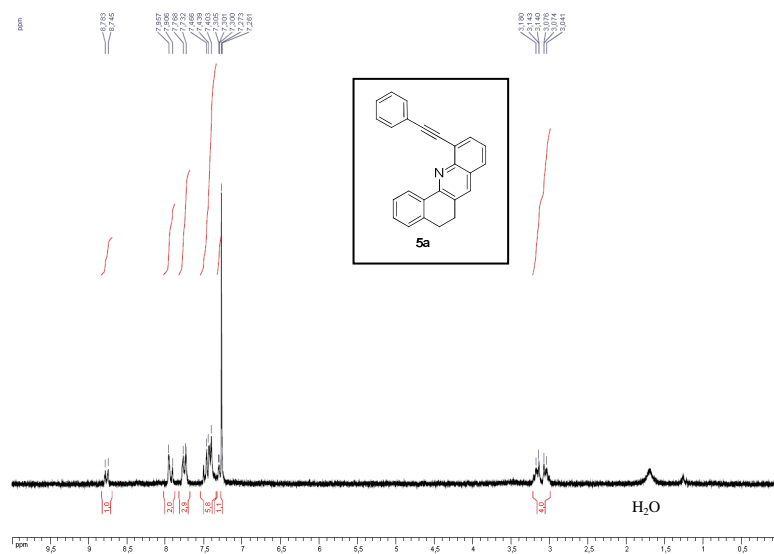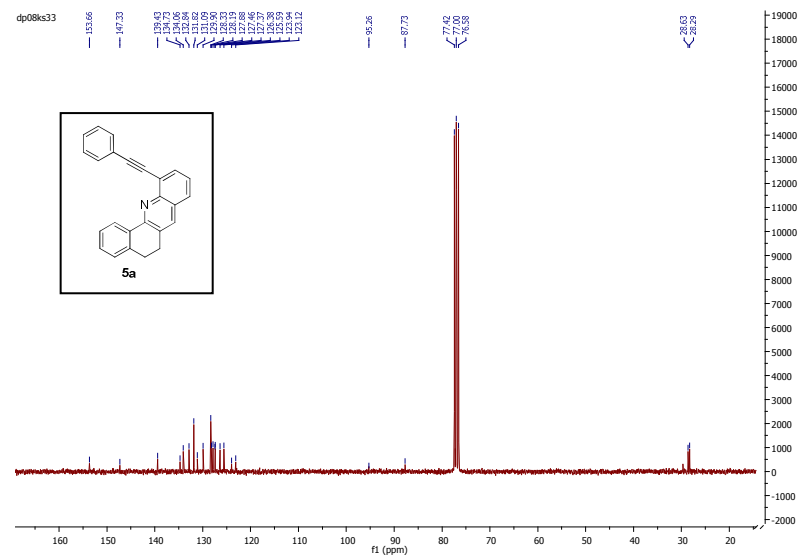

**<sup>1</sup>H NMR and <sup>13</sup>C NMR of 13-(Phenylethynyl)-7,8-dihydroacridine[2,1-c]acridine 5b:**

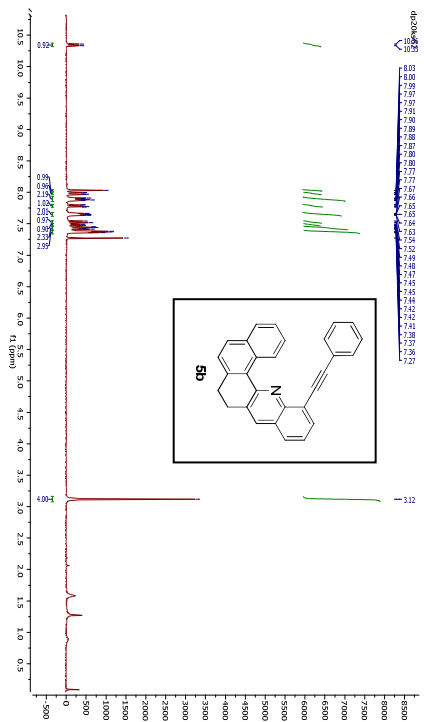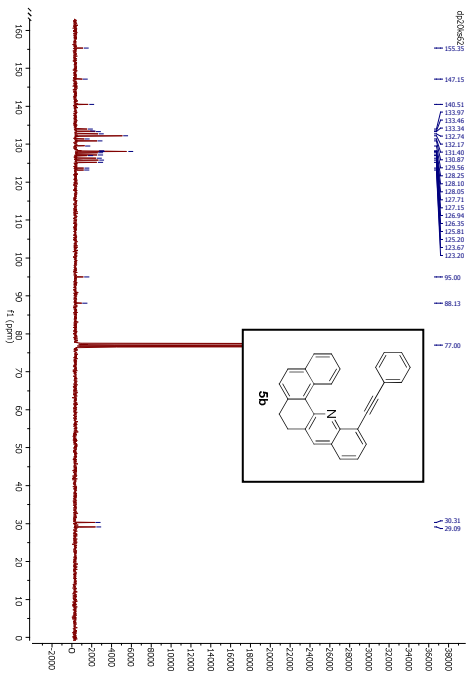

**$^1\text{H}$  NMR and  $^{13}\text{C}$  NMR of  $N^1$ -(5,6-dihydrobenzo[*c*]acridin-11-*y*)- $N^3,N^3$ -dimethylpropane-1,3-diamine **6a**:**

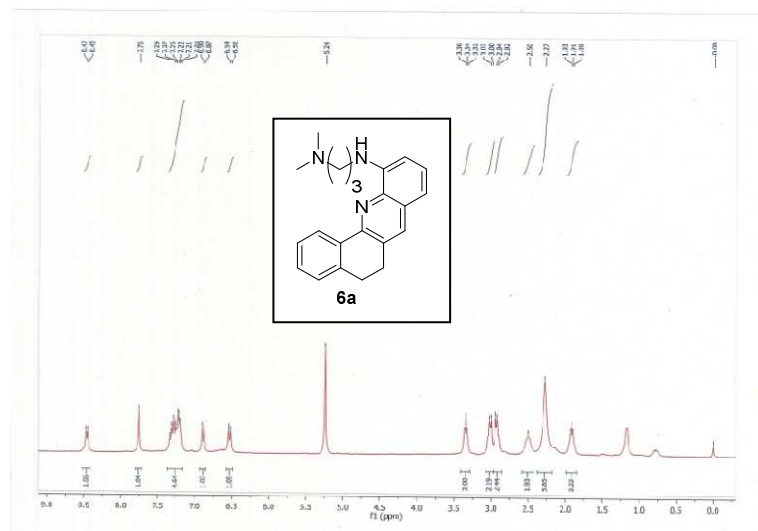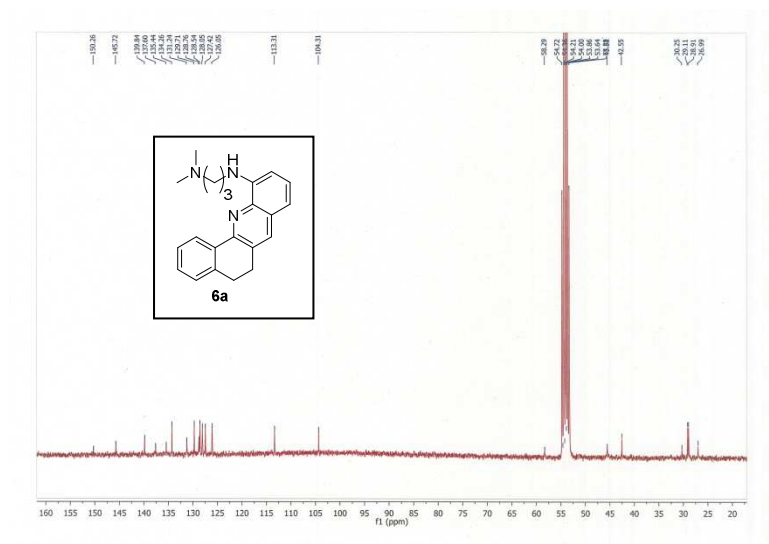

**$^1\text{H}$  NMR of  $N^1$ -(7,8-dihydro[2,1,c]acridin-13-yl)- $N^3,N^3$ -dimethylpropane-1,3-diamine **6b**:**

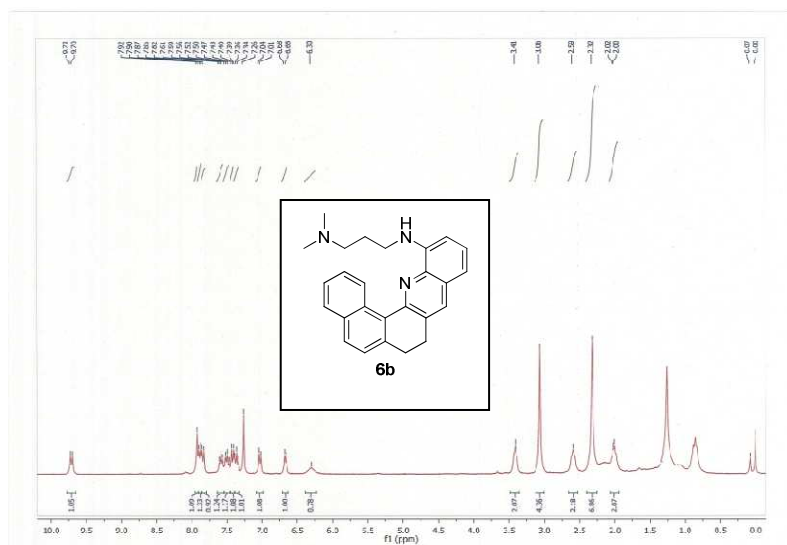

Product **6b** was obtained only as traces and thus was not isolated and fully characterized.











**<sup>1</sup>H NMR and <sup>13</sup>C NMR of 11 of 3-(5,6-dihydrobenzo[c]acridin-11-yl)-1-methylquinolin-1-ium 9:**

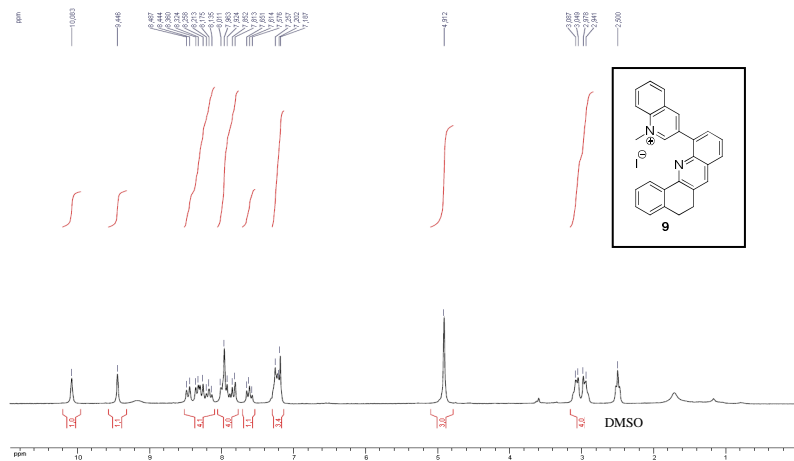

## Typical MW profile

Anton Paar GmbH  
Anton-Paar-Straße 20  
8054 Graz  
Austria

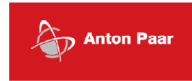

### Anton Paar Monowave

Serial Number: 80869474  
User Interface Firmware Version: 2.20.4621.7

Experiment Date: Wednesday, March 12, 2014 11:21 AM

#### Experiment Settings

##### Method

| Step | Program                  | Temperature<br>°C | Time<br>mm:ss | Power<br>W | Cooling | Stirrer Speed<br>rpm |
|------|--------------------------|-------------------|---------------|------------|---------|----------------------|
| 1    | Heat as fast as possible | 180               | -             | 850        | Off     | 800                  |
| 2    | Hold                     | -                 | 15:00         | 850        | Off     | 800                  |
| 3    | Cool down                | 55                | 0:00          | -          | On      | 800                  |

#### Experiment Result

Result: OK

Temperature Control: IR

Date of last IR sensor adjustment: Tuesday, April 10, 2012 12:11 PM

User name of last IR sensor adjustment: Administrator

Vial Type: Glass vial G10

**Note: Recommended IR sensor adjustment interval of 365 days has expired!**

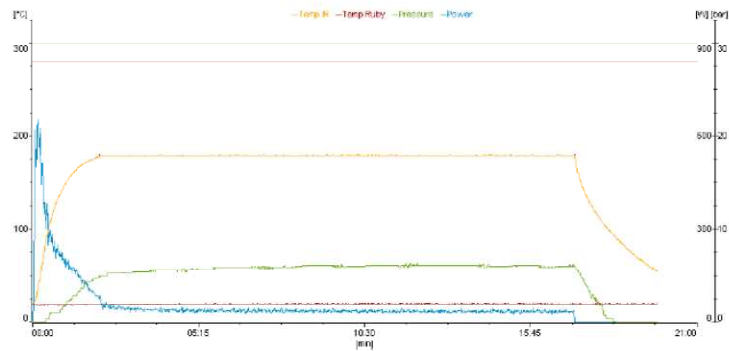

Supplement: c5ob00456j1.pdf [file c5ob00456j1.pdf]
